# Supplementary material for: Seasonal Movements, Aggregations and Diving Behavior of Atlantic Bluefin Tuna (Thunnus thynnus) Revealed with Archival Tags
Source: PLoS One. 2009 Jul 7;4(7):e6151. doi: 10.1371/journal.pone.0006151 (PMC2701635; doi:10.1371/journal.pone.0006151)
Supplement: Table S1 — Release and recapture information of archival tagged Atlantic bluefin tuna. (0.05 MB XLS) [file pone.0006151.s001.xls]

## Sheet: ArchivalRecoveries_paper
	ID	Type	Tag Number	Release Date	Lat.	Long.	Curved Length (cm)	Estim. Age1 (years)	Recapture Date	Lat.	Long.	Days At Liberty	Tag Returned	Movements across 45°	Breeding status
	1	NMT	X	1996-03-01	35	-75	n.a.	n.a.	1997-06-01	36.87	12.85	457	N	1	East
	2	WC	97-112*	1997-03-21	35.05	-75.3167	210	8.64326	1997-08-28	42.08	-65.55	160	Y	n.a.	Neutral
	3	WC	97-041	1997-03-08	35.104	-75.294	196	7.75283	1997-09-13	43.12	-70.07	189	Y	n.a.	Neutral
	4	WC	97-030*	1997-03-07	35.0235	-75.4485	202	8.1268	1998-05-03	40.96	-48.36	422	Y	n.a.	Neutral
	5	WC	97-X	1997-03-01	35	-75	n.a.	n.a.	1998-06-03	36.57	12.53	459	N	1	East
	6	NMT	275	1997-03-07	35.0333	-75.4	192	7.50952	1998-07-04	39.91	-70.62	484	Y	n.a.	Neutral
	7	WC	97-043	1997-03-20	35.1133	-75.23	180	6.80645	1998-09-17	41.45	-69.23	546	Y	n.a.	Neutral
	8	NMT	267	1997-02-21	35.0182	-75.415	176	6.58051	1998-09-25	41.27	-69.14	581	Y	n.a.	Neutral
	9	WC	97-102*	1997-03-17	35.05	-75.35	210	8.64326	1998-10-07	45.19	-61.01	569	Y	n.a.	Neutral
	10	WC	97-019*	1997-03-07	35.0158	-75.4077	193	7.56991	1998-11-14	37.37	-74.42	617	Y	n.a.	Neutral
	11	WC	97-036	1997-03-08	35.1115	-75.2868	197	7.8144	1998-12-24	43.37	-52.00	656	N	n.a.	Neutral
	12	WC	97-027*	1997-03-07	35.0235	-75.4472	171	6.30364	1999-04-16	24.00	-83.00	770	Y	n.a.	West
	13	WC	97-X	1997-03-01	35	-75	n.a.	n.a.	1999-06-01	34.97	14.13	822	N	1	East
	14	NMT	268	1997-03-16	35.0167	-75.3333	190	8.00779	1999-06-16	34.89	14.08	822	N	1	East
	15	NMT	719	1999-01-30	34.4185	-76.6733	208	8.51216	1999-07-10	41.16	-70.67	161	N	n.a.	Neutral
	16	NMT	350	1997-03-07	35.0342	-75.4103	198	7.87627	1999-08-15	42.06	-65.58	891	Y	n.a.	Neutral
	17	NMT	720	1999-02-07	34.4605	-76.6103	220	9.31995	1999-08-20	42.26	-69.95	194	N	n.a.	Neutral
	18	WC	98-491	1999-01-16	34.519	-76.6652	209	8.57754	1999-08-29	42.16	-69.57	225	N	n.a.	Neutral
	19	NMT	396	1997-03-04	35.1167	-75.2833	197	7.8144	1999-09-17	58.52	-27.24	927	Y	1	Neutral
	20	NMT	602	1999-01-21	34.5532	-76.6393	212	8.77573	1999-09-21	41.27	-69.25	243	N	n.a.	Neutral
	21	NMT	153*	1996-03-23	34.56	-75.75	183	6.97859	1999-09-27	41.29	-69.22	1283	Y	n.a.	Neutral
	22	WC	97-089*	1997-03-17	35.0333	-75.3667	203	8.19022	1999-09-28	41.17	-69.13	925	Y	n.a.	Neutral
	23	WC	97-022*	1997-03-17	35.05	-75.35	186	7.1531	1999-10-08	41.25	-69.07	935	Y	n.a.	Neutral
	24	WC	97-048*	1997-03-07	35.0222	-75.45	200	8.00091	1999-10-08	53.88	-44.88	945	Y	1	Neutral
	25	NMT	273	1997-03-05	34.9687	-75.4123	169	6.19457	2000-03-27	33.4	-21.25	1118	N	1	Neutral
	26	WC	98-521*	1999-01-01	34.5807	-76.3723	219	9.25063	2000-04-06	37.41	-19.72	461	Y	1	West
	27	NMT	382	1997-03-07	35.0167	-75.45	190	7.3896	2000-05-01	23.9	-84.08	1151	Y	n.a.	West
	28	WC	98-500	1999-12-31	34.5287	-76.4263	249	13.5929	2000-05-08	34.53	13.59	494	N	1	East
	29	WC	97-063	1997-03-21	35.1062	-75.2343	185	7.09467	2000-05-15	33.42	-15.03	1151	N	1	Neutral
	30	NMT	1233	1999-02-09	34.3918	-76.5847	224	10.8667	2000-05-24	35.22	-6.20	470	Y	1	East
	31	NMT	408*	1997-03-03	35.0948	-75.2615	203	9.01321	2000-06-15	35.37	12.53	1200	Y	1	East
	32	NMT	667*	1999-01-20	34.5155	-76.6585	226	9.74404	2000-07-12	41.40	-69.29	539	Y	n.a.	West
	33	NMT	363	1997-03-07	35.042	-75.4003	208	8.51216	2000-07-30	42.41	-70.47	1241	N	n.a.	Neutral
	34	WC	97-038*	1997-03-07	35.0297	-75.4328	195	7.69157	2000-08-03	42.00	-70.00	1245	Y	n.a.	Neutral
	35	WC	98-507*	1999-01-16	34.5133	-76.6377	217	9.11312	2000-08-08	42.00	-70.00	570	Y	n.a.	West
	36	WC	98-512*	1999-01-17	34.5333	-76.6333	207	8.44711	2000-08-22	41.18	-69.10	583	Y	n.a.	West
	37	WC	97-051	1997-03-20	35.1133	-75.23	198	7.87627	2000-09-09	40.5	-69.42	1269	Y	n.a.	Neutral
	38	WC	97-016*	1997-03-07	35.0173	-75.424	n.a.	n.a.	2000-09-10	41.16	-70.67	1283	Y	n.a.	Neutral
	39	WC	97-017*	1997-03-07	35.0167	-75.45	200	8.00091	2000-09-12	41.68	-69.97	1285	Y	n.a.	Neutral
	40	WC	97-037*	1997-03-07	35.0287	-75.4365	195	7.69157	2000-09-17	40.5	-69.42	1290	Y	n.a.	Neutral
	41	WC	98-492*	1999-01-06	34.389	-76.2798	229	9.96153	2000-09-22	40.5	-69.4	625	Y	n.a.	West
	42	NMT	277	1997-03-04	35.1167	-75.2833	178	6.69298	2000-10-02	40.5	-69.42	1308	Y	n.a.	Neutral
	43	NMT	715*	1999-01-27	34.8935	-75.732	201	8.0637	2000-10-04	40.5	-69.42	616	Y	n.a.	Neutral
	44	WC	97-067*	1997-03-08	35.1	-75.3167	202	8.1268	2000-10-08	41.16	-70.67	1310	Y	n.a.	Neutral
	45	WC	98-485*	1999-01-21	34.5065	-76.6588	208	8.51216	2000-10-15	52.03	-32.14	633	Y	3	West
	46	WC	98-502*	1999-01-14	34.6267	-76.3017	214	8.90961	2001-04-26	29.31	-13.08	833	Y	1	Neutral
	47	WC	98-504*	1999-12-31	34.5498	-76.3732	227	11.1596	2001-05-05	35.46	-6.16	856	Y	1	East
	48	NMT	779*	1999-01-20	34.4958	-76.6668	218	10.3037	2001-06-03	38.36	2.27	865	Y	3	East
	49	WC	98-495	1999-02-15	34.3787	-76.5805	213	9.85612	2001-06-15	35.20	-6.20	851	Y	1	East
	50	WC	98-508*	1999-01-17	34.5373	-76.65	199	8.69372	2001-06-15	38.89	15.65	880	Y	1	East
	51	WC	97-091	1997-03-17	35.0333	-75.3667	190	7.3896	2001-06-30	43.21	-69.66	1566	Y	n.a.	Neutral
	52	WC	98-480	1999-01-21	34.5005	-76.6557	210	8.64326	2001-08-04	42.25	-70.25	926	Y	n.a.	Neutral
	53	WC	97-045	1997-03-20	35.1133	-75.23	200	8.00091	2001-08-08	43.23	-51.63	1602	Y	n.a.	Neutral
	54	NMT	391	1997-03-07	35.0333	-75.4	193	7.56991	2001-08-16	42.07	-65.61	1623	Y	n.a.	Neutral
	55	NMT	921	1999-01-17	34.5035	-76.6328	184	7.03649	2001-08-28	42.72	-69.83	954	Y	n.a.	Neutral
	56	NMT	942	1999-01-20	34.5167	-76.6485	229	9.96153	2001-09-01	41.16	-70.67	955	Y	n.a.	Neutral
	57	WC	98-511	1999-01-06	34.3663	-76.2792	201	8.85228	2002-06-15	33.98	14.00	891	N	1	East
	58	WC	98-518*	1999-01-16	34.5233	-76.6433	209	8.57754	2002-08-30	40.5	-69.41	1322	Y	n.a.	Neutral
	59	NMT	705*	1999-02-11	34.398	-76.593	222	10.6757	2002-08-31	35.95	-5.55	1297	Y	1	East
	60	NMT	1143*	1999-02-09	34.4015	-76.593	210	8.64326	2002-09-22	41.16	-70.67	1321	Y	n.a.	West
	61	NMT	952	1999-02-11	34.3628	-76.5778	201	8.0637	2002-10-16	41.16	-70.67	1343	Y	n.a.	Neutral
	62	WC	97-028*	1997-03-07	35.0172	-75.444	n.a.	n.a.	2002-10-23	41.14	-69.04	2056	Y	n.a.	Neutral
	63	WC	97-103*	1997-03-17	35.05	-75.35	185	7.09467	2002-10-24	40.5	-69.42	2412	Y	n.a.	Neutral
	64	WC	97-011*	1997-03-16	35.017	-75.033	201	8.0637	2003-02-23	23.66	-83.466	2170	Y	n.a.	West
	65	NMT	X	1997-03-01	35	-75	n.a.	n.a.	2003-05-01	35.82	13.55	2252	Cut up	1	East
	66	WC	98-510*	1999-01-14	34.6267	-76.3017	218	10.3037	2003-05-03	36.8	12.5	1570	Y	n.a.	East
	67	LTD	1013*	2003-01-16	34.56	-76.311	189	7.33006	2003-05-04	41.58	-34.42	108	Y	1	Neutral
	68	WC	98-516*	1999-01-17	34.5578	-76.6513	191	8.08188	2003-06-03	35.12	14.09	1598	Y	1	East
	69	NMT	603*	1999-01-17	34.547	-76.648	191	8.08188	2003-07-02	38.466	0.983	1627	Y	1	East
	70	LTD	553	2003-01-14	34.3333	-76.5178	189	7.33006	2003-07-16	43.61	-57.84	183	Y	n.a.	Neutral
	71	NMT	439	1997-03-17	35.046	-75.364	195	7.69157	2003-08-30	41.16	-70.67	2357	Y	n.a.	Neutral
	72	LTD	902*	2003-01-26	34.56	-76.28	176	6.58051	2003-09-06	44.59	-66.47	223	N	n.a.	Neutral
	73	WC	97-082	1997-03-08	35.1	-75.3	184	7.03649	2003-10-20	40.50	-69.43	2417	Y	n.a.	Neutral
	74	NMT	796	1999-01-30	34.8772	-75.7412	209	8.57754	2003-10-24	41.16	-70.67	1728	Y	n.a.	Neutral
	75	WC	97-073	1997-03-17	35.046	-75.3637	185	7.64481	2003-10-25	36.5	12.4	2357	Y	n.a.	East
	76	NMT	947	1999-02-09	34.4	-75.61	191	8.08188	2004-01-04	33.98	14	1790	N	1	East
	77	LTD	793*	2003-01-13	34.37	-76.75	218	9.18169	2004-02-09	28.79	-79.15	392	Y	n.a.	Neutral
	78	WC	97-047	1997-03-17	35.06	-75.379	202	8.93245	2004-05-06	35.03	15.259	2607	N	1	East
	79	LTD	1025*	2003-01-13	34.401	-76.557	190	7.3896	2004-06-05	45.366	-30.083	509	Y	1	Neutral
	80	LTD	5	2002-01-28	34.016	-76.41	186	7.71643	2004-07-01	38	1.23	885	N	1	East
	81	LTD	2162	2004-01-17	34.44	-76.17	202	8.1268	2004-08-17	42.72	-69.83	213	N	n.a.	Neutral
	82	NMT	378	1997-03-03	35.09	-75.28	178	6.69298	2004-09-07	35.095	-75.37	2745	Y	n.a.	Neutral
	83	LTD	2250	2004-01-22	34.42	-76.22	240	10.7926	2004-09-22	41.16	-70.67	244	N	n.a.	Neutral
	84	WC	97-094	1997-03-17	35.03	-75.37	193	7.56991	2004-10-02	41.16	-70.67	2756	Y	n.a.	Neutral
	85	WC	98-487	1999-01-13	34.6042	-76.3615	204	9.09459	2004-10-23	35.13	14.39	2110	Y	1	East
	86	LTD	14*	2002-02-01	35.041	-75.998	201	8.85228	2004-11-30	35.95	-5.49	1033	N	1	East
	87	LTD	781*	2003-01-14	34.413	-76.53	213	8.84249	2004-12-26	46.483	-39.983	712	Y	1	Neutral
	88	LTD	744*	2003-01-18	34.58	-76.319	207	8.44711	2004-12-30	44.5	-30.283	712	Y	1	Neutral
	89	LTD	528	2003-01-25	34.546	-76.311	204	8.25395	2005-04-04	33.96	-21.57	800	Y	1	Neutral
	90	NMT	716	1999-01-27	34.892	-75.733	201	8.0637	2005-05-08	35.55	-6.09	2293	Y	n.a.	Neutral
	91	WC	97-087	1997-03-20	35.083	-75.267	184	7.03649	2005-05-08	35.55	-6.09	2971	Y	n.a.	Neutral
	92	WC	97-015	1997-03-07	35.017	-75.45	189	7.9342	2005-05-09	35.95	-5.75	2985	Y	1	East
	93	LTD	2159*	2004-01-17	34.439	-76.148	218	10.3037	2005-04-20	42.16	-9.74	459	Y	1	East
	94	LTD	524	2003-01-16	34.656	-76.308	209	8.57754	2005-08-08	42	-67.44	935	N	n.a.	Neutral
	95	LTD	755	2003-01-16	34.581	-76.3	207	8.44711	2005-08-08	42	-67.44	935	N	n.a.	Neutral
	96	LTD	2211	2004-01-05	34.495	-76.261	222	9.45974	2005-08-08	42	-67.88	581	N	n.a.	Neutral
	97	LTD	1021*	2003-01-26	34.664	-76.28	190	7.3896	2005-08-12	42	-67.44	929	Y	n.a.	Neutral
	98	WC	97-120	1997-03-17	35.103	-75.308	206	8.3824	2005-08-15	43.02	-70.04	3073	Y	n.a.	Neutral
	99	LTD	1000*	2003-01-21	34.39	-76.35	199	7.93844	2005-08-27	41	-71	949	Y	1	Neutral
	100	LTD	2158*	2004-01-22	34.436	-76.188	180	6.80645	2005-09-03	41.16	-70.67	590	N	n.a.	Neutral
	101	LTD	532*	2003-01-25	34.5495	-76.3222	208	8.51216	2005-10-12	44.6089	-63.0686	991	Y	n.a.	West
	102	LTD	556	2003-01-25	34.484	-76.275	172	6.7547	2005-11-01	32.68	32.15	1011	Y	1	East
	103	LTD	2217*	2004-01-09	34.506	-76.246	222	9.45974	n.a.	n.a.	n.a.	n.a.	Y	n.a.	Neutral
	104	LTD	219*	2005-01-12	34.465	-76.3407	200	8.00091	2006-03-16	36	-74.44	428	Y	n.a.	Neutral
	105	LTD	1016*	2003-01-18	34.4893	-76.2677	209	9.51099	2006-06-10	35.316	15.2	1241	Y	1	East
	106	LTD	1005*	2003-01-18	34.4562	-76.2855	185	7.64481	2006-06-26	35.316	15.873	1255	Y	1	East
		* Tags for which daily geo-locations could be calculated.
		1 Western growth model (Turner, 1994) applied to western & neutral breedingstatus, eastern growth model (Cort, 1991) for eastern breedingstatus.
